# Supplementary material for: Kinetical Study, Thermo-Mechanical Characteristics and Recyclability of Epoxidized Camelina Oil Cured with Antagonist Structure (Aliphatic/Aromatic) or Functionality (Acid/Amine) Hardeners
Source: MDPI journal article supplement (doi:10.3390/polym13152503), 2021-07-29
Supplement: s1 [file s1]

*Article*

# **Kinetical Study, Thermo-Mechanical Characteristics and Recyclability of Epoxidized Camelina Oil Cured with Antagonist Structure (Aliphatic/Aromatic) or Functionality (Acid/Amine) Hardeners**

**Chiara Di Mauro <sup>1</sup>, Aratz Genua <sup>2</sup> and Alice Mija <sup>1,\*</sup>**

<sup>1</sup> Institut de Chimie de Nice, UMR CNRS 7272, Université Côte d'Azur, 06108 Nice, France; chiara.di-mauro@univ-cotedazur.fr

<sup>2</sup> CIDETEC, Basque Research and Technology Alliance (BRTA), Paseo Miramon196, 20014 Donostia-San Sebastian, Spain; agenua@cidetec.es

\* Correspondence: alice.mija@univ-cotedazur.fr

**Supplementary Materials**

**Table S1.** Structure and characteristics of ECMO.

| EVOs  | Structure                                                                                                            | Epoxy content<br>(meq/g) | Mw<br>(g/mol)      |
|-------|----------------------------------------------------------------------------------------------------------------------|--------------------------|--------------------|
| ECMO  | 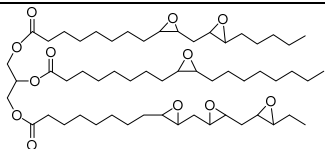 <p>Epoxidized Camelina Oil</p>     | 5.24                     | 965                |
|       |                                                                                                                      | Mw (g/mol)               | Melting Point (°C) |
| DTBA  |  <p>2,2'-Dithiodibenzoic acid</p>   | 306,35                   | 287-290            |
| 4-AFD |  <p>4-Aminophenyl disulfide</p>     | 248.37                   | 77-78              |
| DTDA  |  <p>3,3'-Dithiodipropionic acid</p> | 210,27                   | 155-158            |
| IM    |  <p>Imidazole</p>                 | 68,07                    | 88-91              |

**Table S2.** Acronyms and composition of formulations ECMO/DTBA<sub>x</sub>DTDA<sub>y</sub> - DTBA<sub>x</sub> 4-AFD<sub>y</sub>.

| Formulations                                | Composition (% in mol) |       |                       | mol                   |                       | Mixing ratio of<br>ELO: DTBA/4-AFD | IM (wt.%) |
|---------------------------------------------|------------------------|-------|-----------------------|-----------------------|-----------------------|------------------------------------|-----------|
|                                             | DTBA                   | DTDA  | ECMO                  | DTBA                  | DTDA                  |                                    |           |
| ECMO/DTBA <sub>100</sub>                    | 100                    | 0     | 1.12·10 <sup>-3</sup> | 5.61·10 <sup>-4</sup> | /                     | 1:1                                | 1         |
| ECMO/DTBA <sub>70</sub> DTDA <sub>30</sub>  | 70                     | 30    | 1.12·10 <sup>-3</sup> | 3.93·10 <sup>-4</sup> | 3.36·10 <sup>-4</sup> | 1:1                                | 1         |
| ECMO/DTBA <sub>50</sub> DTDA <sub>50</sub>  | 50                     | 50    | 1.12·10 <sup>-3</sup> | 2.8·10 <sup>-4</sup>  | 2.8·10 <sup>-4</sup>  | 1:1                                | 1         |
| ECMO/DTBA <sub>30</sub> DTDA <sub>70</sub>  | 30                     | 70    | 1.12·10 <sup>-3</sup> | 3.36·10 <sup>-4</sup> | 3.93·10 <sup>-4</sup> | 1:1                                | 1         |
| ECMO/DTDA <sub>100</sub>                    | 0                      | 100   | 1.12·10 <sup>-3</sup> | /                     | 5.61·10 <sup>-4</sup> | 1:1                                | 1         |
| Formulations                                | Composition (% in mol) |       |                       | mol                   |                       | Mixing ratio of<br>ELO: DTBA/4-AFD | IM (wt.%) |
|                                             | DTBA                   | 4-AFD | ECMO                  | DTBA                  | 4-AFD                 |                                    |           |
| ECMO/DTBA <sub>70</sub> 4-AFD <sub>30</sub> | 70                     | 30    | 1.12·10 <sup>-3</sup> | 3.93·10 <sup>-4</sup> | 3.36·10 <sup>-4</sup> | 1:1                                | 1         |
| ECMO/DTBA <sub>50</sub> 4-AFD <sub>50</sub> | 50                     | 50    | 1.12·10 <sup>-3</sup> | 2.8·10 <sup>-4</sup>  | 2.8·10 <sup>-4</sup>  | 1:1                                | 1         |
| ECMO/DTBA <sub>30</sub> 4-AFD <sub>70</sub> | 30                     | 70    | 1.12·10 <sup>-3</sup> | 3.36·10 <sup>-4</sup> | 3.93·10 <sup>-4</sup> | 1:1                                | 1         |
| ECMO/4-AFD <sub>100</sub>                   | 0                      | 100   | 1.12·10 <sup>-3</sup> | /                     | 5.61·10 <sup>-4</sup> | 1:1                                | 1         |

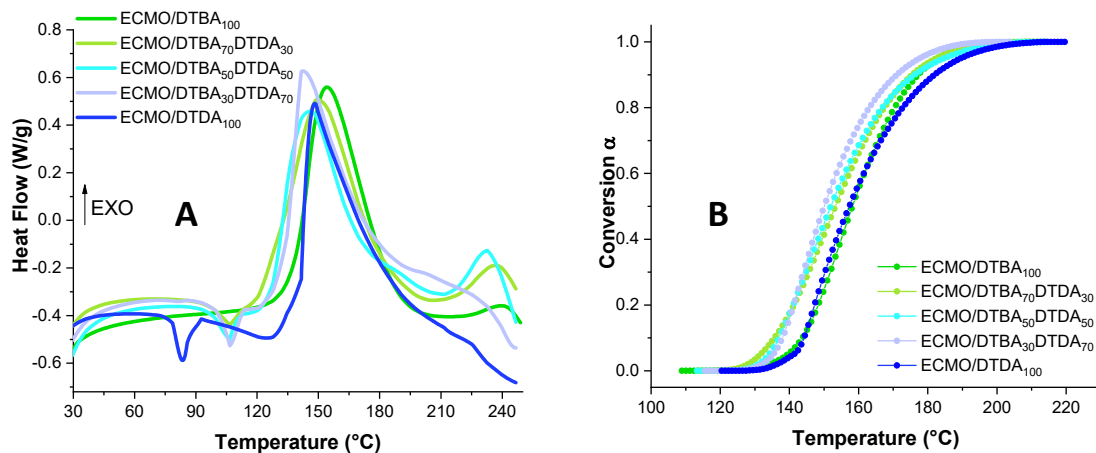

**Figure S1.** - DSC thermograms and degree of conversion  $\alpha$  (B) for the ECMO bio-epoxy monomers combined with the diacids aromatic/aliphatic hardeners in R 1:1 and 1 wt.% of IM.

**Table S3.** DSC results for the ECMO/DTBA<sub>x</sub>DTDA<sub>y</sub> systems.

| Materials designation                      | $T_{on}$ (°C) | $T_{peak}$ (°C) | $T_{end}$ (°C) | $\Delta H$ (J/g) |
|--------------------------------------------|---------------|-----------------|----------------|------------------|
| ECMO/DTBA <sub>100</sub>                   | 137           | 155             | 187            | 171              |
| ECMO/DTBA <sub>70</sub> DTDA <sub>30</sub> | 126           | 150             | 182            | 168              |
| ECMO/DTBA <sub>50</sub> DTDA <sub>50</sub> | 128           | 145             | 173            | 140              |
| ECMO/DTBA <sub>30</sub> DTDA <sub>70</sub> | 135           | 143             | 175            | 156              |
| ECMO/DTDA <sub>100</sub>                   | 141           | 147             | 180            | 153              |

**Table S4.** Curing and post-curing protocol for the ECMO/DTBA<sub>x</sub>DTDA<sub>y</sub> and ECMO/DTBA<sub>x</sub>4AFD<sub>y</sub> systems.

| Materials designation                       | Curing          | Post-curing     | Aspect                                                                                |
|---------------------------------------------|-----------------|-----------------|---------------------------------------------------------------------------------------|
| ECMO/DTBA <sub>100</sub>                    | 130 °C – 60 min | 170 °C – 30 min |    |
| ECMO/DTBA <sub>70</sub> DTDA <sub>30</sub>  | 130 °C – 60 min | 170 °C – 30 min |    |
| ECMO/DTBA <sub>50</sub> DTDA <sub>50</sub>  | 130 °C – 60 min | 170 °C – 30 min |    |
| ECMO/DTBA <sub>30</sub> DTDA <sub>70</sub>  | 130 °C – 60 min | 170 °C – 30 min |   |
| ECMO/DTDA <sub>100</sub>                    | 140 °C – 60 min | 180 °C – 30 min |  |
| ECMO/DTBA <sub>70</sub> 4-AFD <sub>30</sub> | 120 °C – 60 min | 160 °C – 30 min |  |
| ECMO/DTBA <sub>50</sub> 4-AFD <sub>50</sub> | 20 °C – 60 min  | 160 °C – 30 min |  |

|                                             |                  |                 |                                                                                     |
|---------------------------------------------|------------------|-----------------|-------------------------------------------------------------------------------------|
| ECMO/DTBA <sub>30</sub> 4-AFD <sub>70</sub> | 120 °C – 60 min  | 160 °C – 30 min |  |
| ECMO/4-AFD <sub>100</sub>                   | 180 °C – 150 min | 200 °C – 30 min |  |

**Table S5.** Reprocessing conditions and aspects of the reprocessed ECMO/DTBA<sub>x</sub>DTDA<sub>y</sub> and ECMO/DTBA<sub>x</sub>4AFD<sub>y</sub> thermosets.

| Materials                                      | Reprocessing conditions       | Aspect                                                                              | Materials                                       | Reprocessing conditions      | Aspect                                                                                |
|------------------------------------------------|-------------------------------|-------------------------------------------------------------------------------------|-------------------------------------------------|------------------------------|---------------------------------------------------------------------------------------|
| ECMO/<br>DTBA <sub>100</sub>                   | 170 °C<br>10 min<br>2 Tons    | 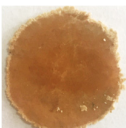   |                                                 |                              |                                                                                       |
| ECMO/<br>DTBA <sub>70</sub> DTDA <sub>30</sub> | 150 °C<br>15 min<br>1 Ton     |   | ECMO/<br>DTBA <sub>70</sub> 4-AFD <sub>30</sub> | 150 °C<br>10 min<br>1 Ton    |  |
| ECMO/<br>DTBA <sub>50</sub> DTDA <sub>50</sub> | 150 °C<br>10 min<br>1 Ton     |  | ECMO/<br>DTBA <sub>50</sub> 4-AFD <sub>50</sub> | 150 °C<br>10 min<br>0.5 Tons |  |
| ECMO/<br>DTBA <sub>30</sub> DTDA <sub>70</sub> | 150 °C<br>10 minutes<br>1 Ton |  | ECMO/<br>DTBA <sub>30</sub> 4-AFD <sub>70</sub> | 150 °C<br>10 min<br>0.5 Tons |  |
| ECMO/<br>DTDA <sub>100</sub>                   | 170 °C<br>10 minutes<br>1 Ton |  | ECMO/<br>4-AFD <sub>100</sub>                   | 150 °C<br>10 min<br>0.3 Tons |  |

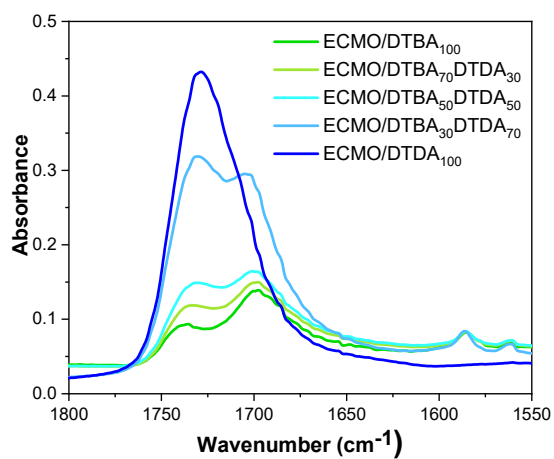

Figure S2. - FT-IR zoom of the ECMO/DTBA<sub>x</sub>DTDA<sub>y</sub> blends in the region from 1800 to 1150 cm<sup>-1</sup>.

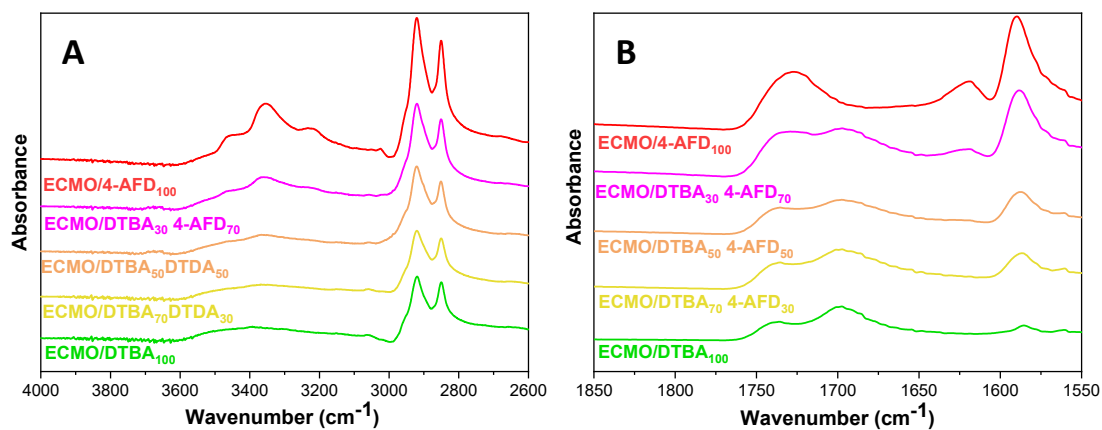

Figure S3. Evolution of FT-IR spectra of the uncured ECMO/DTBA<sub>x</sub>4-AFD<sub>y</sub> blends: (A) zoom in the region of 4000-2600 cm<sup>-1</sup> and (B) 1850-1550 cm<sup>-1</sup>.

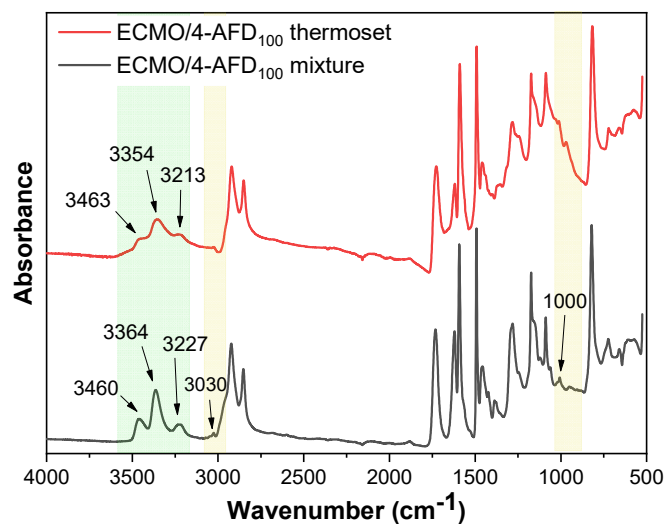

**Figure S4.** - FT-IR evolution of the reactive groups of the ECMO/4-AFD<sub>100</sub> in unreacted mixture and after the curing protocol.

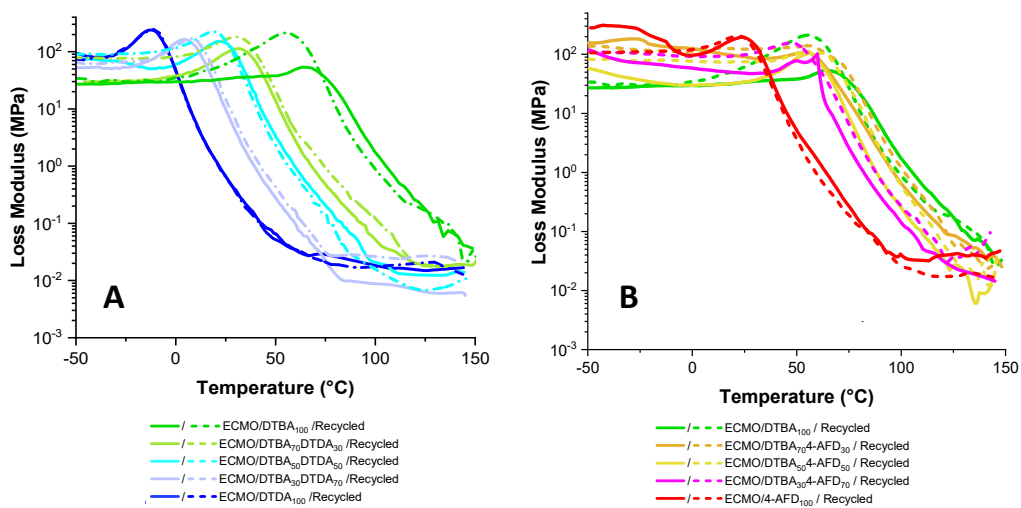

**Figure S5.** – Loss Modulus vs. temperature for the virgin and recycled (A) ECMO/DTBA<sub>x</sub>DTDA<sub>y</sub> and (B) ECMO/DTBA<sub>x</sub>4-AFD<sub>y</sub> thermosetting resins.

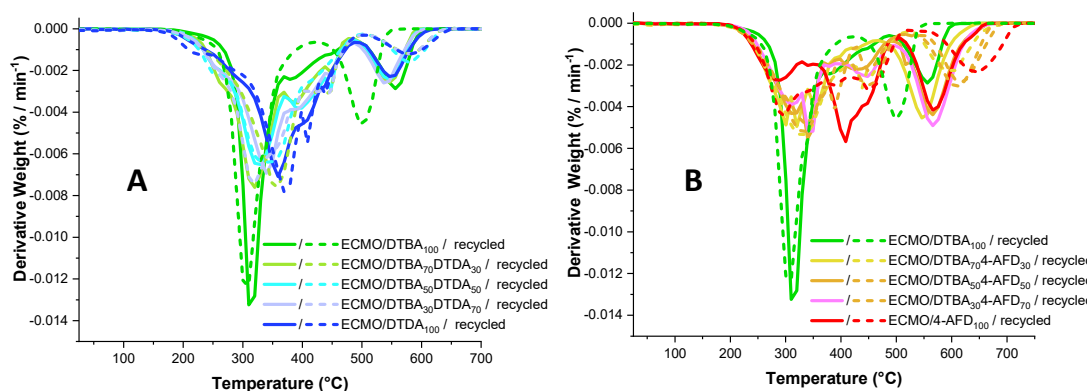

**Figure S6.** - DTG for the neat ECMO/DTBA<sub>x</sub>DTDA<sub>y</sub> and combination of the diacids crosslinkers **(A)** and neat ECMO/DTBA<sub>x</sub>4-AFD<sub>y</sub> and mixture of diacid/diamine blends **(B)**.

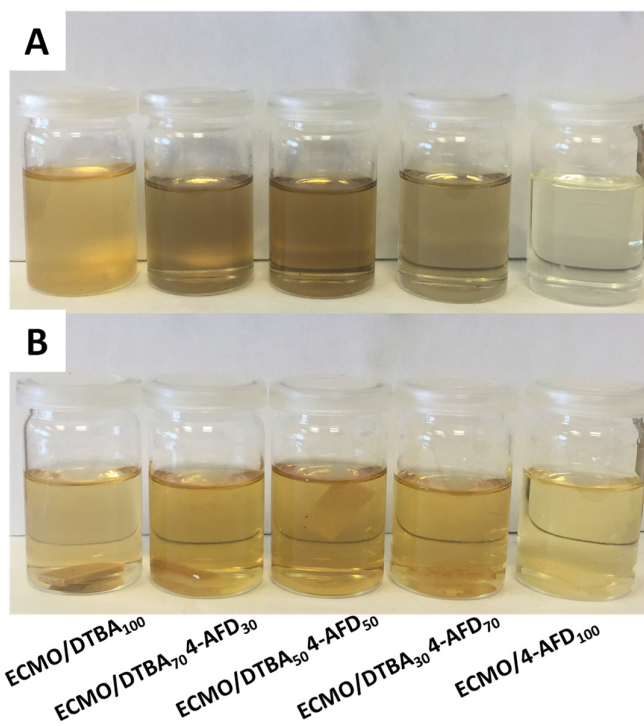

**Figure S7.** **(A)** Chemical recycling in DMF solution of dithiothreitol for ECMO/DTBA<sub>x</sub>DTDA<sub>x</sub> after 24 hours at 50 °C and **(B)** solvent resistance in 1N NaOH solution after 3 days at room temperature.



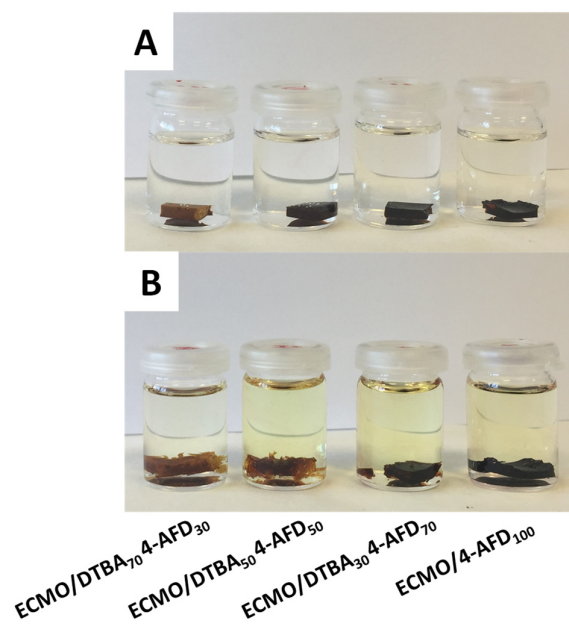

**Figure S8.** – Solvent resistance tests in (A) ethanol and (B) acetone after 72 hours at room temperature for the ECMO/DTBA<sub>x</sub>-4-AFD<sub>y</sub> resins.

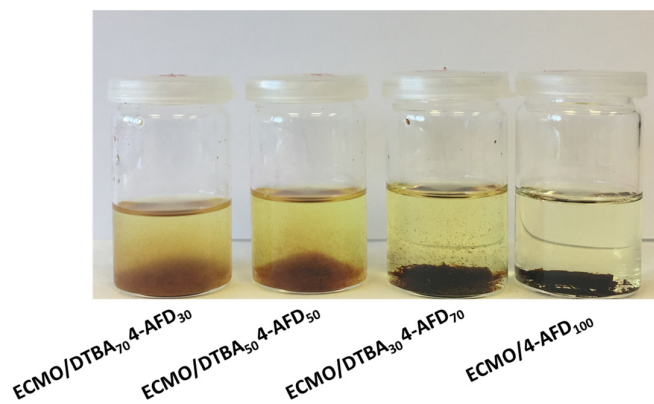

**Figure S9.** Solvent test in THF for ECMO/DTBA<sub>x</sub>-4-AFD<sub>y</sub> resins after 72 hours at room temperature.
